# Supplementary material
Source: PubMed Central journal article supplement (PMC4017951)
Supplement: NIHMS574448-supplement-Supplementarydata.pdf [file NIHMS574448-supplement-Supplementarydata.pdf]

**Table S1. Ca<sup>2+</sup> and Mg<sup>2+</sup> coordination in the Gla domains of FVIIa and APC**

The Ca<sup>2+</sup>/Mg<sup>2+</sup> concentration and the ω-loop ligand binding influence the metal ion selectivity and the coordination geometry in the Gla domains.

| Metal          | d-FFR-FVIIa/sTF<br>(Ca Only) <sup>a</sup> 1DAN |        | dEGR-FVIIa/sTF<br>(Mg2.5/Ca5) 3TH2 |        | dEGR-VIIa/sTF<br>(Mg5/Ca45) 3TH4 |        | APC-Gla/EPCR<br>(Mg5/Ca5) 3JTC |        |
|----------------|------------------------------------------------|--------|------------------------------------|--------|----------------------------------|--------|--------------------------------|--------|
| <b>Ca1/Mg1</b> | O <sub>ε1</sub> Gla25                          | 2.95 Å | O <sub>ε3</sub> Gla25              | 2.10 Å | O <sub>ε1</sub> Gla25            | 1.84 Å | O <sub>ε2</sub> Gla25          | 2.08 Å |
|                | O <sub>ε3</sub> Gla25                          | 2.48 Å | O <sub>ε2</sub> Gla25              | 2.12 Å | O <sub>ε3</sub> Gla25            | 2.09 Å | O <sub>ε4</sub> Gla25          | 2.07 Å |
|                | O <sub>ε1</sub> Gla29                          | 2.44 Å | O <sub>ε1</sub> Gla29              | 2.10 Å | O <sub>ε1</sub> Gla29            | 2.13 Å | O <sub>ε1</sub> Gla29          | 2.04 Å |
|                | O <sub>ε3</sub> Gla29                          | 3.11 Å | O <sub>ε3</sub> Gla29              | 1.94 Å | O <sub>ε3</sub> Gla29            | 2.11 Å | O <sub>ε4</sub> Gla29          | 2.03 Å |
|                |                                                |        | H <sub>2</sub> O 635               | 2.11 Å | H <sub>2</sub> O 297             | 1.90 Å | O <sub>ε1</sub> Glu86          | 2.05 Å |
|                |                                                |        | H <sub>2</sub> O 424               | 2.04 Å | H <sub>2</sub> O 325             | 2.12 Å | H <sub>2</sub> O 615           | 2.10 Å |
| <b>Ca2</b>     | O <sub>ε2</sub> Gla26                          | 2.38 Å | O <sub>ε1</sub> Gla29              | 2.96 Å | O <sub>ε2</sub> Gla7             | 2.38 Å | O <sub>ε4</sub> Gla29          | 2.47 Å |
|                | O <sub>ε3</sub> Gla29                          | 2.28 Å | O <sub>ε2</sub> Gla29              | 2.55 Å | O <sub>ε4</sub> Gla7             | 2.24 Å | O <sub>ε2</sub> Gla29          | 2.58 Å |
|                | O <sub>ε4</sub> Gla29                          | 2.56 Å | O <sub>ε3</sub> Gla26              | 2.58 Å | O <sub>ε2</sub> Gla26            | 2.52 Å | O <sub>ε1</sub> Gla26          | 2.35 Å |
|                | O <sub>ε4</sub> Gla7                           | 2.35 Å | H <sub>2</sub> O 267               | 2.27 Å | O <sub>ε3</sub> Gla29            | 2.25 Å | O <sub>ε2</sub> Gla7           | 2.31 Å |
|                | O <sub>ε2</sub> Gla7                           | 2.39 Å | H <sub>2</sub> O 428               | 2.27 Å | O <sub>ε4</sub> Gla29            | 2.31 Å | O <sub>ε4</sub> Gla7           | 2.37 Å |
|                | H <sub>2</sub> O 241                           | 2.65 Å | H <sub>2</sub> O 563               | 2.04 Å | H <sub>2</sub> O 311             | 2.26 Å | O <sub>ε1</sub> Glu86          | 2.33 Å |
|                | H <sub>2</sub> O 242                           | 2.50 Å |                                    |        | H <sub>2</sub> O 326             | 2.66 Å | H <sub>2</sub> O 47            | 2.32 Å |
| <b>Ca3</b>     | O <sub>ε3</sub> Gla16                          | 2.54 Å | O <sub>ε3</sub> Gla26              | 3.50 Å | O <sub>ε4</sub> Gla29            | 2.59 Å | O <sub>ε1</sub> Gla7           | 2.67 Å |
|                | O <sub>ε4</sub> Gla29                          | 2.57 Å | O <sub>ε4</sub> Gla26              | 3.02 Å | O <sub>ε1</sub> Gla26            | 2.38 Å | O <sub>ε3</sub> Gla7           | 2.47 Å |
|                | O <sub>ε1</sub> Gla26                          | 2.46 Å | O <sub>ε3</sub> Gla16              | 3.37 Å | O <sub>ε2</sub> Gla7             | 2.44 Å | O <sub>ε1</sub> Gla16          | 2.58 Å |
|                | O <sub>ε1</sub> Gla7                           | 2.68 Å | O <sub>ε2</sub> Gla29              | 2.56 Å | O <sub>ε3</sub> Gla16            | 2.66 Å | O <sub>ε2</sub> Gla26          | 2.44 Å |
|                | O <sub>ε2</sub> Gla7                           | 2.53 Å | H <sub>2</sub> O 639               | 2.26 Å | O <sub>ε1</sub> Gla7             | 2.66 Å | O <sub>ε3</sub> Gla29          | 2.55 Å |
|                | H <sub>2</sub> O 188                           | 2.57 Å | H <sub>2</sub> O 564               | 2.88 Å | H <sub>2</sub> O 84              | 2.23 Å | H <sub>2</sub> O 56            | 2.44 Å |
|                | H <sub>2</sub> O 189                           | 2.51 Å | H <sub>2</sub> O 267               | 2.36 Å | H <sub>2</sub> O 139             | 2.64 Å | H <sub>2</sub> O 57            | 2.48 Å |
|                | H <sub>2</sub> O 190                           | 2.61 Å | H <sub>2</sub> O 490               | 2.77 Å | H <sub>2</sub> O 191             | 2.33 Å | H <sub>2</sub> O 74            | 2.34 Å |
|                |                                                |        |                                    |        |                                  |        |                                |        |
| <b>Ca4/Mg4</b> | O <sub>ε1</sub> Gla16                          | 2.27 Å | O <sub>ε1</sub> Gla16              | 1.86 Å | O <sub>ε4</sub> Gla26            | 2.44 Å | O <sub>ε2</sub> Gla6           | 2.64 Å |
|                | O <sub>ε3</sub> Gla16                          | 2.38 Å | O <sub>ε3</sub> Gla16              | 2.05 Å | O <sub>ε1</sub> Gla26            | 2.56 Å | O <sub>ε1</sub> Gla7           | 2.33 Å |
|                | O <sub>ε1</sub> Gla26                          | 2.49 Å | O <sub>ε4</sub> Gla26              | 1.98 Å | O <sub>δ1</sub> Asn2             | 2.44 Å | O <sub>ε1</sub> Gla16          | 2.46 Å |
|                | O <sub>ε4</sub> Gla26                          | 2.64 Å | O <sub>ε1</sub> Gla26              | 1.91 Å | O <sub>ε1</sub> Gla16            | 2.31 Å | O <sub>ε3</sub> Gla16          | 2.37 Å |
|                | O <sub>δ1</sub> Asn2                           | 2.34 Å | H <sub>2</sub> O 638               | 1.82 Å | O <sub>ε1</sub> Gla6             | 2.50 Å | O <sub>ε2</sub> Gla26          | 2.64 Å |
|                | O <sub>ε1</sub> Gla7                           | 2.36 Å | H <sub>2</sub> O 397               | 2.11 Å | O <sub>ε1</sub> Gla7             | 2.40 Å | O <sub>ε4</sub> Gla26          | 2.39 Å |
|                | O <sub>ε1</sub> Gla6                           | 2.56 Å |                                    |        | O <sub>ε3</sub> Gla16            | 2.34 Å | O <sub>δ1</sub> Asn2           | 2.31 Å |
|                |                                                |        |                                    |        | O Ala1                           | 3.19 Å | O Ala1                         | 2.97 Å |
|                |                                                |        |                                    |        |                                  |        |                                |        |
| <b>Ca5</b>     | O ALA1                                         | 2.37 Å | O <sub>ε1</sub> Gla16              | 2.18 Å | O <sub>ε3</sub> Gla20            | 2.61 Å | O <sub>ε3</sub> Gla16          | 2.45 Å |
|                | O <sub>ε3</sub> Gla16                          | 2.49 Å | O <sub>ε2</sub> Gla16              | 2.42 Å | O <sub>ε4</sub> Gla20            | 2.47 Å | O <sub>ε4</sub> Gla16          | 2.50 Å |
|                | O <sub>ε4</sub> Gla16                          | 2.41 Å | O <sub>ε3</sub> Gla20              | 2.82 Å | O <sub>ε4</sub> Gla6             | 2.34 Å | O <sub>ε2</sub> Gla6           | 2.48 Å |
|                | O <sub>ε4</sub> Gla20                          | 2.71 Å | O Ala1                             | 3.21 Å | O <sub>ε1</sub> Gla6             | 2.47 Å | O <sub>ε3</sub> Gla20          | 2.37 Å |
|                | O <sub>ε1</sub> Gla20                          | 2.63 Å | H <sub>2</sub> O 565               | 2.87 Å | O Ala1                           | 2.40 Å | O <sub>ε4</sub> Gla20          | 2.56 Å |
|                | O <sub>ε2</sub> Gla6                           | 2.61 Å | H <sub>2</sub> O 568               | 2.44 Å | O <sub>ε2</sub> Gla16            | 2.53 Å | O <sub>ε4</sub> Gla6           | 2.34 Å |
|                | O <sub>ε1</sub> Gla6                           | 2.69 Å |                                    |        | O <sub>ε1</sub> Gla16            | 2.54 Å | O Ala1                         | 2.39 Å |
|                | H <sub>2</sub> O 186                           | 2.51 Å |                                    |        | H <sub>2</sub> O 197             | 2.38 Å | H <sub>2</sub> O 59            | 2.45 Å |
|                |                                                |        |                                    |        |                                  |        |                                |        |
| <b>Ca6</b>     | O <sub>ε1</sub> Gla20                          | 2.48 Å | O <sub>ε2</sub> Gla20              | 2.55 Å | O <sub>ε1</sub> Gla20            | 2.54 Å | O <sub>ε1</sub> Gla20          | 2.46 Å |
|                | O <sub>ε3</sub> Gla20                          | 2.62 Å | O <sub>ε3</sub> Gla20              | 2.11 Å | O <sub>ε3</sub> Gla20            | 2.55 Å | O <sub>ε4</sub> Gla20          | 2.21 Å |
|                |                                                |        | H <sub>2</sub> O 568               | 2.81 Å | H <sub>2</sub> O 218             | 2.30 Å | H <sub>2</sub> O 63            | 2.31 Å |
|                |                                                |        | H <sub>2</sub> O 570               | 2.38 Å | H <sub>2</sub> O 328             | 2.37 Å | H <sub>2</sub> O 66            | 1.99 Å |
|                |                                                |        |                                    |        | H <sub>2</sub> O 327             | 2.45 Å | H <sub>2</sub> O 79            | 2.19 Å |
|                |                                                |        |                                    |        | H <sub>2</sub> O 329             | 2.36 Å | H <sub>2</sub> O 80            | 2.15 Å |
|                |                                                |        |                                    |        |                                  |        |                                |        |
| <b>Ca7/Mg7</b> | O <sub>ε2</sub> Gla14                          | 2.71 Å | O <sub>ε4</sub> Gla14              | 2.09 Å | O <sub>ε2</sub> Gla19            | 2.09 Å | O <sub>ε1</sub> Gla19          | 2.22 Å |
|                | O <sub>ε3</sub> Gla14                          | 2.39 Å | O <sub>ε1</sub> Gla14              | 2.02 Å | O <sub>ε3</sub> Gla19            | 2.02 Å | O <sub>ε4</sub> Gla19          | 2.00 Å |
|                | O <sub>ε2</sub> Gla19                          | 2.28 Å | O <sub>ε2</sub> Gla19              | 1.93 Å | O <sub>ε2</sub> Gla14            | 1.73 Å | O <sub>ε3</sub> Gla14          | 2.08 Å |
|                | O <sub>ε3</sub> Gla19                          | 2.70 Å | O <sub>ε4</sub> Gla19              | 2.11 Å | O <sub>ε3</sub> Gla14            | 2.10 Å | O <sub>ε1</sub> Gla14          | 2.14 Å |
|                | H <sub>2</sub> O 243                           | 2.79 Å | H <sub>2</sub> O 649               | 2.10 Å | H <sub>2</sub> O 330             | 2.23 Å | H <sub>2</sub> O 67            | 2.19 Å |
|                |                                                |        |                                    |        | H <sub>2</sub> O 331             | 1.97 Å | H <sub>2</sub> O 99            | 2.26 Å |

<sup>a</sup>Ca Only, 10 mM Ca<sup>2+</sup>; Mg5/Ca45, 5 mM Mg<sup>2+</sup>/45 mM Ca<sup>2+</sup>; Mg2.5/Ca5, 2.5 mM Mg<sup>2+</sup>/5 mM Ca<sup>2+</sup>; Mg5/Ca5, 5 mM Mg<sup>2+</sup>/5 mM Ca<sup>2+</sup>.
